# Supplementary material for: Model-based in silico analysis of the PI3K/Akt pathway: the elucidation of cross-talk between diabetes and breast cancer
Source: PeerJ journal article supplement (doi:10.7717/peerj.5917), 2018-11-09

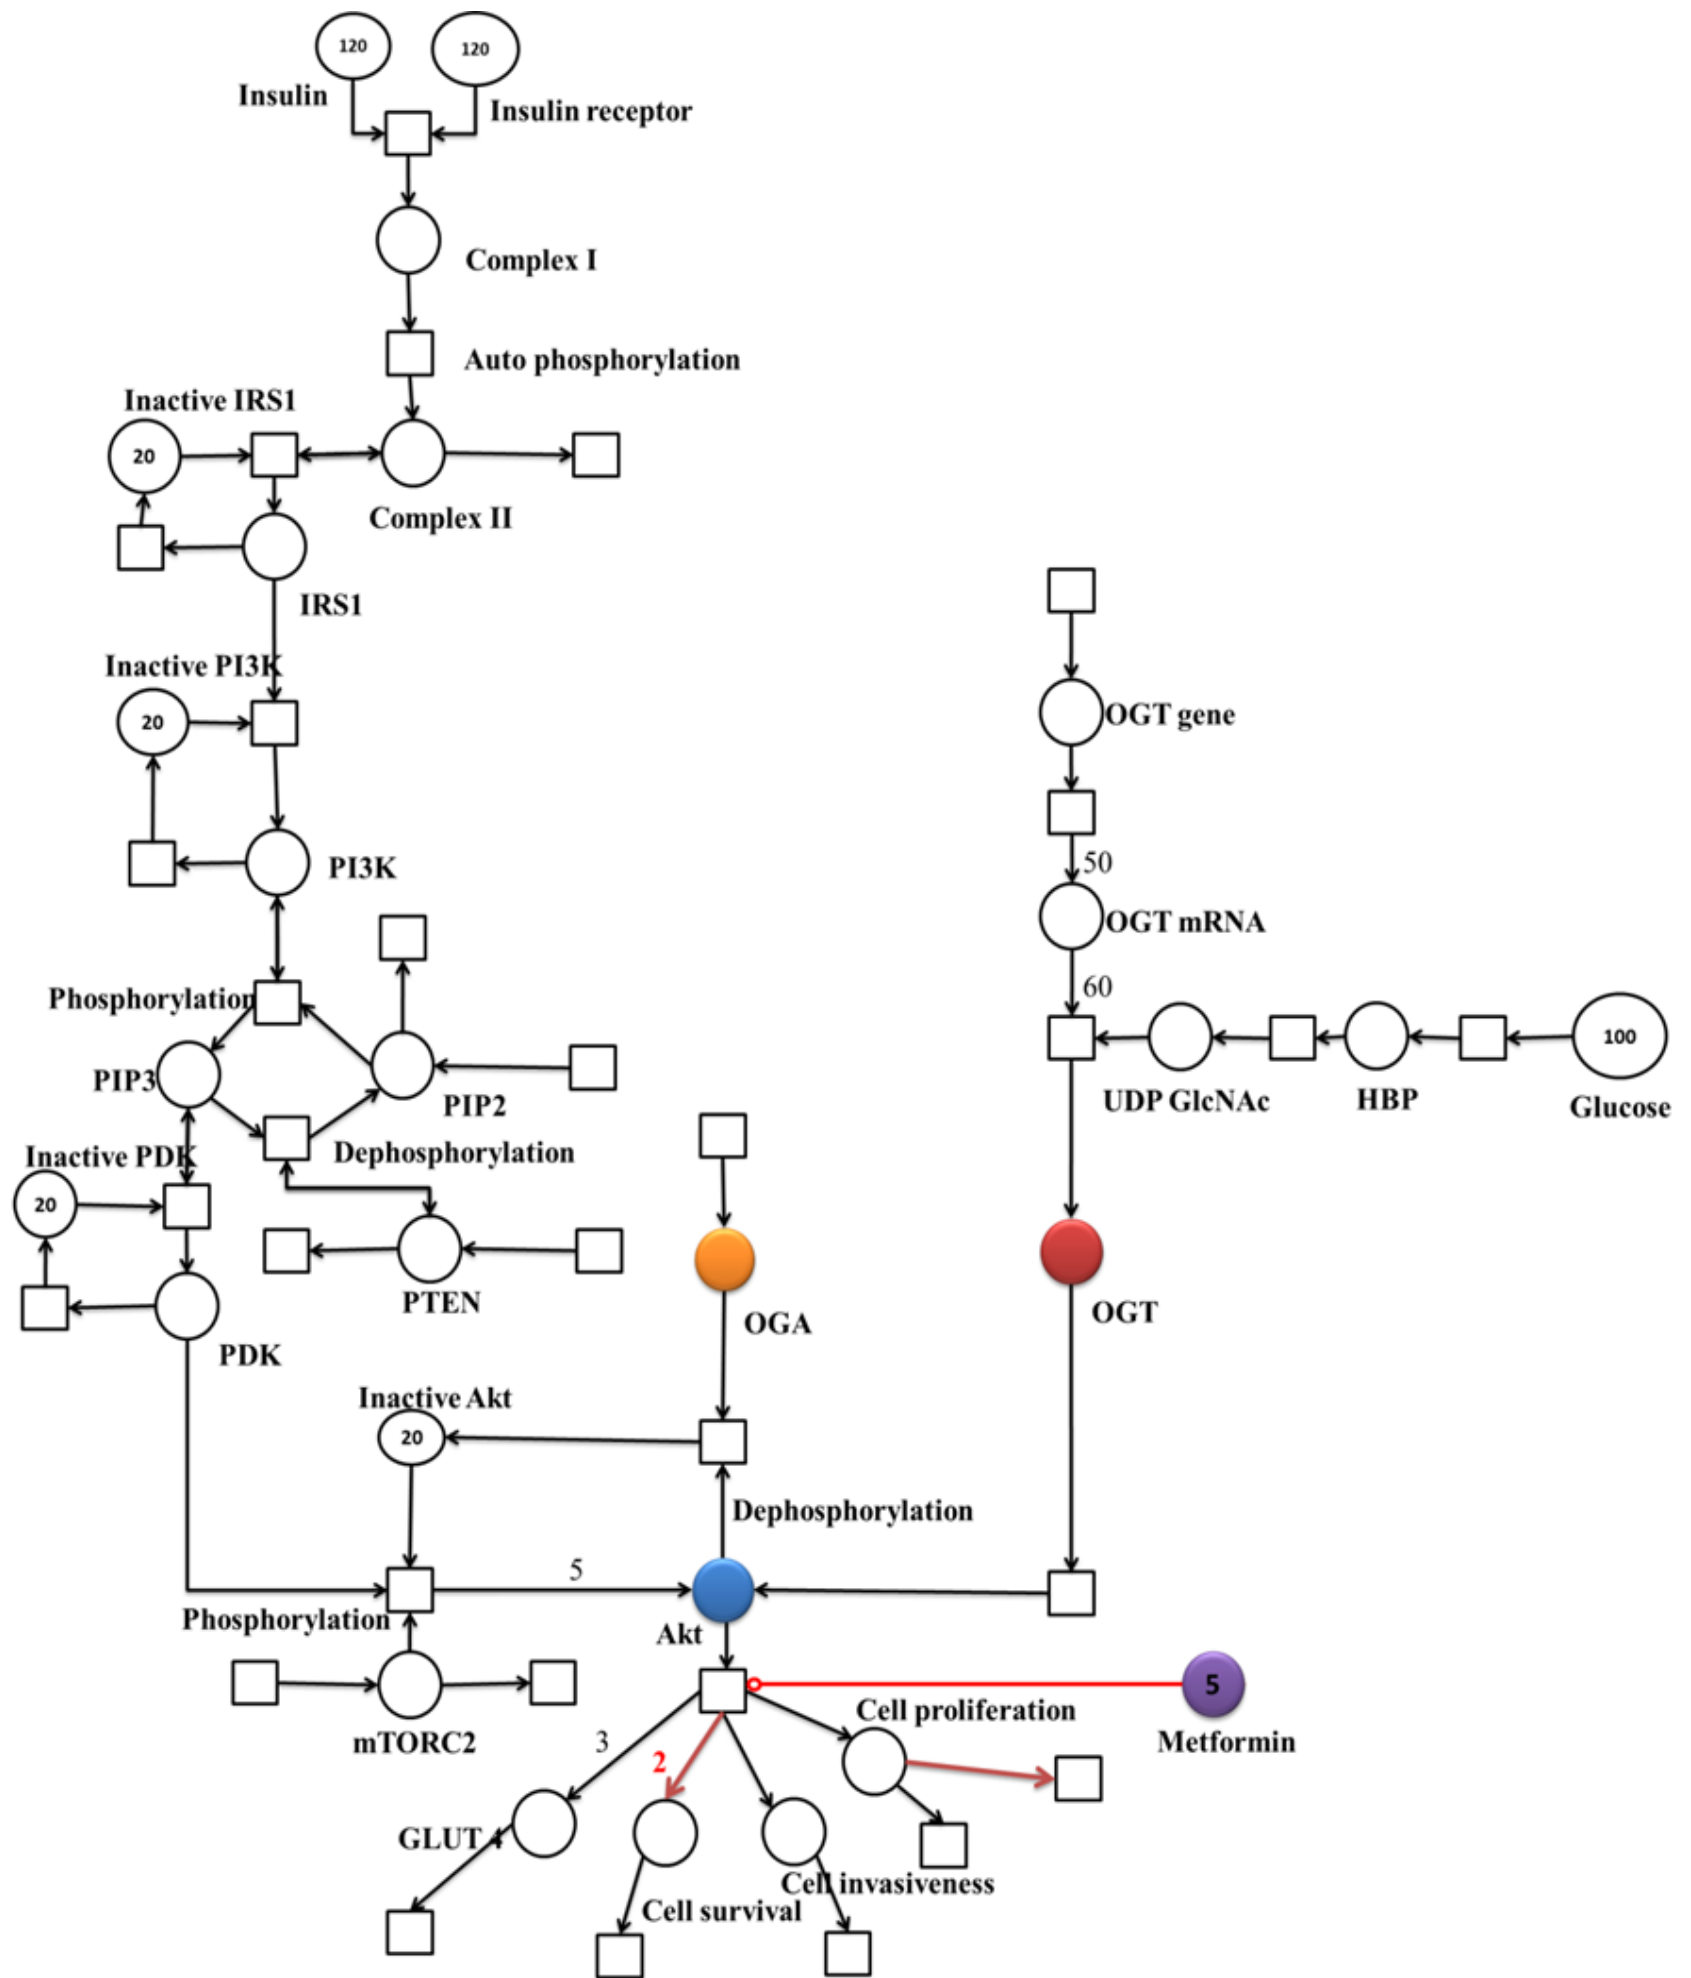

Supplement: Supplementary_Figure_4.pdf [file Supplementary_Figure_4.pdf]
